# Supplementary material
Source: publisher figshare collection journal article supplement (https://acs.figshare.com/ndownloader/files/10369635)
Supplement: Supplementary file 1 [file 10369635]

## FIGURE CAPTIONS

Dynamics of physicochemical characteristics during stacking and alcoholic

fermentation processes. “S<sub>0</sub>, S<sub>1</sub>, S<sub>2</sub>” are short for stacking fermentation days: 0, 1, 2.

And “A<sub>0</sub>, A<sub>5</sub>, A<sub>15</sub>, A<sub>30</sub>” are short for that of alcoholic fermentation days: 0, 5, 15, and 30.

**Figure S1.** (A) Changes in moisture

**Figure S2.** (B) Changes in acidity

**Figure S3.** (C) Changes in temperature

**Figure S4.** (D) Changes in alcohol

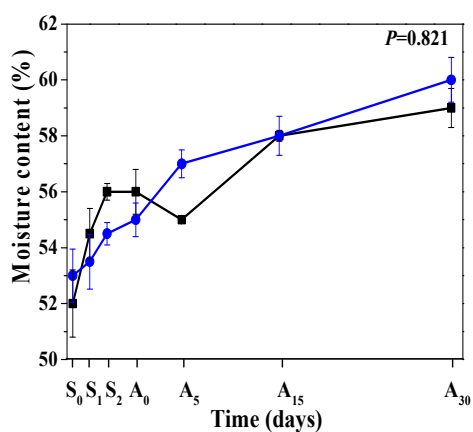

**Figure S1**

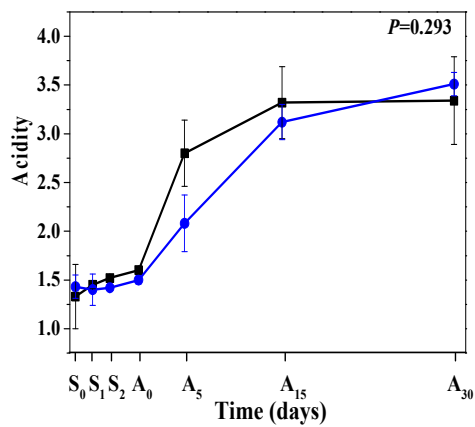

**Figure S2**

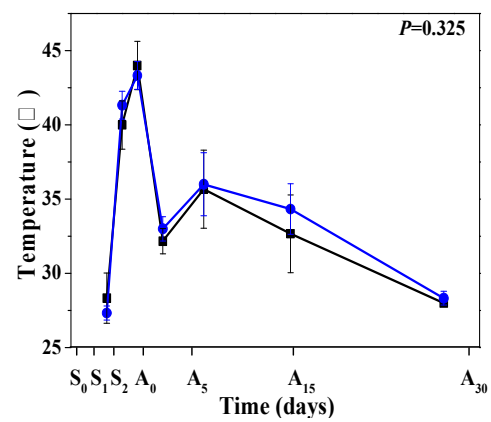

Figure S3

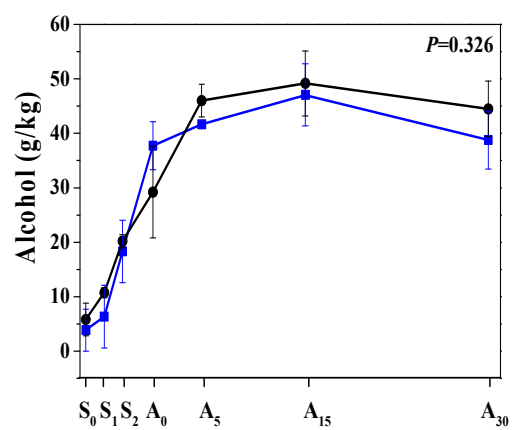

Figure S4

—■— Unioculated —●— Inoculated
